# Supplementary material for: Willingness to participate in COVID-19 vaccine trials; a survey among a population of healthcare workers in Uganda
Source: PubMed Central journal article supplement (PMC8158909; doi:10.1371/journal.pone.0251992), 2021-05-27
Supplement: pone.0251992.s002.pdf [file pone.0251992.s002.pdf]

# COVID-19 VACCINE PREPAREDNESS STUDY (COVAP) QUESTIONNAIRE

**Study ID:**

|               |
|---------------|
| Protocol code |
| C V P         |

|               |
|---------------|
| Facility code |
|               |

|                |
|----------------|
| Participant ID |
|                |

**Date:**

|    |  |
|----|--|
|    |  |
| dd |  |

|     |  |  |
|-----|--|--|
|     |  |  |
| MMM |  |  |

|      |  |  |  |
|------|--|--|--|
|      |  |  |  |
| yyyy |  |  |  |

**Demographics** Olina emyaka emeka? .....

1. Emyaka .....
2. Gender (*londako kimu*)
  - a) Male
  - b) Female
3. Oli mufumbo? (*Londako kimu*)
  - a) Siri mufumbo (ssiwasangako/ssifumbirwangako)
  - b) Ndi mufumbo/Nina omuntu gwetuberagana naye
  - c) Twayawukana/Omwagalwa wange yafa
  - d) Ssaagala kukiddamu
4. Okola mulimu ki? (*Londako gumu*)
  - a) Medical doctor
  - b) Clinical officer
  - c) Nurse/Midwife
  - d) Assistant nurse
  - e) Radiology/X-ray technician
  - f) Pharmacist/Pharmacy technician or dispenser
  - g) Laboratory personnel
  - h) Physical therapist
  - i) Counselor
  - j) Nutritionist/dietitian
  - k) Student (medical/nursing/other)
  - l) Administrator/Adminitrative assisant
  - m) Other support staff (driver, cleaners, porters, guard, catering etc.)
  - n) Other (specify):.....
5. Mu by'obuyigirize, wakoma ku ddaala ki? (*Londako kimu*)
  - a) Primary school
  - b) O-level
  - c) A-level
  - d) University
  - e) Other higher institution
  - f) Ssaasomako
6. Amakaago mulimu abantu bameka? (Nga naawe weebaliddemu)

|   | Ekibinja ky'emyaka            | Omuwendo |
|---|-------------------------------|----------|
| A | Abaana abataweza myaka18)     |          |
| B | Abakulu (emyaka 18-65)        |          |
| C | Abakadde (abasussa emyaka 65) |          |

# COVID-19 VACCINE PREPAREDNESS STUDY (COVAP) QUESTIONNAIRE

Study ID: 

|               |   |   |
|---------------|---|---|
| Protocol code |   |   |
| C             | V | P |

|               |  |
|---------------|--|
| Facility code |  |
|               |  |

|                |  |  |
|----------------|--|--|
| Participant ID |  |  |
|                |  |  |

 Date: 

|    |  |
|----|--|
|    |  |
| dd |  |

|     |  |  |
|-----|--|--|
|     |  |  |
| MMM |  |  |

|      |  |  |  |
|------|--|--|--|
|      |  |  |  |
| yyyy |  |  |  |

7. Ebikwata ku bulwadde bwa COVID-19 obifuna kuva mu makubo ki? (*londako byonna ebituufu*)
- a) Official international health organisation websites and media e.g. WHO, CDC.
  - b) Official government websites and media e.g. Ministry of Health- Uganda.
  - c) News Media e.g. TVs, radios, Magazines, Newspapers
  - d) Social Media e.g. WhatsApp, Facebook, Twitter, Instagram
  - e) Medical journals
  - f) Others (specify).....

## Willingness to participate in COVID-19 vaccine research

8. Wali wetabyeko mu kunonyereza kw'eby'obulamu? (*londako kimu kyokka*)
- a) Yee
  - b) Nedda
9. Okunoonyereza okuwerako kugenda mu maaso munsu yonna okugezesa eddagala ly'okugema COVID-19. Lwaki tuteekeddwa okukola okunoonyereza okugezesa eddagala ly'okugema COVID-19? (*laga byonna byayogedde*)
- a) Kisoboka eddagala ly'okugema obutakola, era litekeddwa okusooka okugezesebwa.
  - b) Kisoboka eddaga obutaba ddungi eri abantu, era litekeddwa okusooka okugezesebwa
  - c) Tewannazulibwa ddagala liziyiza COVID-19
  - d) Sseekakasa lwaki
  - e) Ssimanyi
  - f) Ensonga endala (nnyonnyola).....
10. Wandibadde mwetegefu okwetaba mu kunoonyereza kw'okugezesa eddagala ly'okugema COVID-19 (*londako kimu*)
- a) Tewali kubuusuusa ndi mwetegefu
  - b) Oba olyawo nyinza
  - c) Nedda, siri mwetegefu kwetabamu nnaakamu
  - d) Oba olyawo nyiza obutetabaamu
  - e) Sseekakasa
11. Bwe kiba nti olonzeewo "tewali kubuusuusa oli mwetegefu"; Oba "oba olyawo oyinza" okwetabamu nnyonnyola, lwaki? (*laga byonna byayogedde*)
- a) Kyakwenyumiriza okuyamba ensi okuzuula eddagala
  - b) Essubi ly'okufuna obukuumi eri ekirwadde kya COVID-19
  - c) Okufuna obujjanjabi obulala
  - d) Nkyayinza okusasulwayo ku ssente olw'okwetabamu
  - e) Ensonga endala (Nnyonnyola).....
12. Bw'oba walonzeewo "mu buli ngeri nedda" oba "osanga nedda", nnyonnyola lwaki (*laga byonna byayogedde*), ogende ku kibuzo ekya 41)

## COVID-19 VACCINE PREPAREDNESS STUDY (COVAP) QUESTIONNAIRE

Study ID: 

|               |   |   |
|---------------|---|---|
| Protocol code |   |   |
| C             | V | P |

|               |  |
|---------------|--|
| Facility code |  |
|               |  |

|                |  |  |
|----------------|--|--|
| Participant ID |  |  |
|                |  |  |

 Date: 

|    |  |
|----|--|
|    |  |
| dd |  |

|     |  |  |
|-----|--|--|
|     |  |  |
| MMM |  |  |

|      |  |  |  |
|------|--|--|--|
|      |  |  |  |
| yyyy |  |  |  |

- a) Okutya/okwelaliikirira okukwatibwa akawuka akaleeta COVID-19 (SARS-CoV-2)
- b) Okwelarikilira obulabe obuyinza okuva mu ddagala erigema
- c) Okutya empiso
- d) Okutya okusosolwa
- e) Nnina eby'okukola bingi/Ssiyinda kuwaawo budde kwetabamu
- f) Ensonga endala (nnyonnyola).....
13. Waliwo omuntu gw'oyinza okwetaaga okwebuzaako nga tonnasalawo kwetaba mu kunonyereza kw'okugezesa eddagala ly'okugema COVID-19? (*laga byonna byayogedde*)
- a) Tewali
- b) Omwagalwa wange
- c) Omuzadde/Oyo aninako obuvunaanyizibwa
- d) Ow'omu maka gaffe omulala
- e) Mukwano gwange
- f) Omukulembeze w'eddini
- g) Omukulembeze mu kitundu
- h) Omusawo
- i) Omulala yenna, (mwogere) .....
14. Wandibadde mwetegefu okwetaba mu kunoonyereza kw'okugezesa eddagala ly'okugema COVID-19 singa wesanga nga kikwetaagisa okugenda ku kitebe ky'okunoonyereza emirundi egiwerako (buli wiiki ne buli luvanyuma lwa myezi esatu) mu bbanga lya myezi 12?
- a) Yee ndi mwetegefu ddala
- b) Oba lyawo ndi mwetegefu
- c) Nedda, siri mwetegefu nnaakamu
- d) Oba olyawo siri mwetegefu
- e) Sseekakasa
15. Wandibadde mwetegefu okuwaayo omusaayi (nga 50mls) buli lw'ojja ku kitebe ky'okunoonyereza, okukeberegwa okulondoola nti eddagala teririna bulabe ate n'okulaba oba liyamba omubiri okukola abaserikale?
- a) Tewali kubuusabuusa ndi mwetegefu
- b) Oba olyawo nyinza okuba omwetegefu
- c) Nedda, siri mwetegefu nnaakamu
- d) Oba olyawo siri mwetegefu
- e) Sseekakasa

**Mu nkola eya bulijjo, abantu abeetaba mu kunoonyereza kw'okugezesa eddagala ly'okugema batekebwa mu kimu ku bibinja ebibiri; abali mu kibinja ekimu bafuna obuyiso bw'eddagala erigezesebwa, ate abalala nebatekebwa mu kibinja ekifuna obuyiso omuli ekintu ekyefaanaanyiriza eddagala erigezesebwa naye nga mukyo temuli kirungo kya ddagala. Ekintu kino kiyitibwa "Placebo" mu lulimi ly'okunoonyereza.**

## COVID-19 VACCINE PREPAREDNESS STUDY (COVAP) QUESTIONNAIRE

Study ID: 

|               |   |   |
|---------------|---|---|
| Protocol code |   |   |
| C             | V | P |

|               |  |
|---------------|--|
| Facility code |  |
|               |  |

|                |  |  |
|----------------|--|--|
| Participant ID |  |  |
|                |  |  |

 Date: 

|    |  |
|----|--|
|    |  |
| dd |  |

|     |  |  |
|-----|--|--|
|     |  |  |
| MMM |  |  |

|      |  |  |  |
|------|--|--|--|
|      |  |  |  |
| yyyy |  |  |  |

16. Wandyetabyemu bwekiba nga okuyita mu nkola ey'akalulu etaliimu kyekubiira, okyayinza okufuna eddagala erigezesebwa lyennyini oba ekyo omutali kirungo?
- Tewali kubuusabuusa ndi mwetegefu
  - Oba olyawo nyinza okuba omwetegefu
  - Nedda, siri mwetegefu nnaakamu
  - Oba olyawo siri mwetegefu
  - Sseekakasa
17. Empiso z'okugema ziyinza okuleeta obuzibu obutonono awo empiso wekubiddwa naye nga obuzibu buno buggwawo mu bbanga ttono ddala. Muno muyinza okubaamu okuwulira obubi, ebbugumu, okumyukirira, n'okuzimba, wamu n'obubonero obulala nga; okuwulira obukowukoowu, okwewulira nga tolima maanyi bulungi, n'okulumizibwa omutwe. Wandyetabyemu ng'otegedde obuzibu buno bw'oyinza okufuna?
- Tewali kubuusabuusa ndi mwetegefu
  - Oba olyawo nyinza okuba omwetegefu
  - Nedda, siri mwetegefu nnaakamu
  - Oba olyawo siri mwetegefu
  - Sseekakasa

**Nga okunoonyereza kw'okugezesa eddagala ly'okugema COVID-19 kukolebwa, abakyala abali embuto tebajja kwetabamu olw'okwerinda obuzibu eddagala bwe liyinza okutuusa ku bulamu bw'omwana ali mu lubuto. Abaami abataasalibwa buseke okubataangira okufunyisa olubuto nabo bajja kusabibwa okuziyiza okufunyisa abagalwa babwe olubuto/embuto.**

18. **Bakyala bokka:** Wandisobodde okweziyiza/okwongezaayo okufuna olubuto ng'okozesa enkola eya kizaala gumba mu kiseera ky'onoonyereza kw'okugezesa eddagala?
- Ssikyazaala (ndi mu myaka egitakyazaala, bankomya)
  - Tewali kubuusabuusa ndi mwetegefu mu buli ngeri ye
  - Oba olyawo nyinza okuba omwetegefu
  - Nedda, ssiri mwetegefu nnaakamu mu buli ngeri nedda
  - Oba olyawo siri mwetegefu osanga nedda
  - Sseekakasa
19. **Abasajja bokka:** Wandikkiriza okwewala okufunyisa omwagalwa wo olubuto nga okunoonyereza kugenda mu maaso?
- Tewali kubuusabuusa ndi mwetegefu
  - Oba olyawo nyinza okuba omwetegefu osanga ye
  - Nedda, ssiri mwetegefu nnaakamu mu buli ngeri nedda
  - Oba olyawo siri mwetegefu osanga nedda
  - Sseekakasa
  - Ssirina mubeezi/gwentabagana naye mu bikolwa eby'ekyaama
  - Ssisobola kufunyisa mwagalwa wange lubuto (bankomya)
  - Omwagalwa wange tasobola kufuna lubuto, okugeza, takyazaala (ali mu myaka egitazaala, bamukomya)

# COVID-19 VACCINE PREPAREDNESS STUDY (COVAP) QUESTIONNAIRE

Study ID: 

|               |   |   |
|---------------|---|---|
| Protocol code |   |   |
| C             | V | P |

|               |  |
|---------------|--|
| Facility code |  |
|               |  |

|                |  |  |
|----------------|--|--|
| Participant ID |  |  |
|                |  |  |

Date:

|    |  |
|----|--|
|    |  |
| dd |  |

|     |  |  |
|-----|--|--|
|     |  |  |
| MMM |  |  |

|      |  |  |  |
|------|--|--|--|
|      |  |  |  |
| yyyy |  |  |  |

## Underlying health conditions

20. Olina obulwadde obw'oluteentezi bwonna?

- a) Yee
- b) Nedda
- c) Ssandyagadde kukyogerako

21. Bwekiba nti "yee" olina obumu kubulwadde buno wammanga?

- a) Obulwadde bw'omutima, okugeza, puleesa
- b) Ssukaari
- c) Asima
- d) Obulwadde bw'amawugwe, okugeza, akafuba
- e) Obulwadde bw'ekibumba
- f) Obulwadde bwa nnalubiri
- g) Akawuka akaleeta mukenenya
- h) Kaansa
- i) Omugejjo oguyitiridde
- j) Obulala (nnyonnyola) \_\_\_\_\_
